# Supplementary material for: Synthesis, characterization and ion-exchange properties of novel hybrid polymer nanocomposites for selective and effective mercury(ii) removal
Source: Royal Society of Chemistry journal article supplement (doi:10.1039/c5ra13004b), 2015-01-01
Supplement: c5ra13004b1.pdf [file c5ra13004b1.pdf]

## Supporting Information:

### Adsorption isotherm study:

The linear equation for Langmuir and Freundlich isotherm models are expressed as follows:

$$\text{Freundlich isotherm} \quad : \log q_e = \log K_F + (1/n) \log C_e \text{ ----- (3)}$$

$$\text{Langmuir isotherm} \quad : (C_e / q_e) = (1 / Q_0 b) + (C_e / Q_0) \text{ ----- (4)}$$

Where  $K_F$  ( $\text{mg g}^{-1}$ ) is the Freundlich constant and 'n' the Freundlich exponent. Where  $q_e$  ( $\text{mg g}^{-1}$ ) is the adsorbed amount of Hg (II) at equilibrium,  $C_e$  ( $\text{mg L}^{-1}$ ) is the equilibrium concentration of Hg (II),  $Q_0$  ( $\text{mg g}^{-1}$ ) and  $b$  ( $\text{L mg}^{-1}$ ) are Langmuir constants related to adsorption capacity and energy of adsorption. Additionally, the important characteristics of the Langmuir isotherm can be explained by the separation factor  $R_L$ , which is calculated by the equation 4.<sup>24</sup>

$$R_L = 1 / (1 + bQ_0) \text{ ----- (5)}$$

The  $R_L$  value assumes the nature and the feasibility of the adsorption process are specified in Table 1.

**Table 1 Nature of adsorption isotherm**

| $R_L$ value   | Adsorption process |
|---------------|--------------------|
| $R_L > 1$     | Unfavorable        |
| $R_L = 1$     | Linear             |
| $0 < R_L < 1$ | Favorable          |
| $R_L = 0$     | Irreversible       |

**Adsorption kinetics study:**

The pseudo-first-order kinetic model can be expressed as:<sup>31</sup>

$$\text{Log}(q_e - q_t) = \text{log } q_e - [k_1 / 2.303] t \text{ ----- (6)}$$

Where  $k_1$  is the pseudo-first-order rate constant ( $\text{min}^{-1}$ ) and  $q_e$  ( $\text{mg g}^{-1}$ ) is the adsorption capacity at equilibrium and  $q_t$  ( $\text{mg g}^{-1}$ ) is the adsorbed amount of metal ion after time  $t$  (min).

The pseudo-second-order kinetic model can be expressed as:<sup>32</sup>

$$t / q_t = 1 / k_2 q_e^2 + t/q_e \text{ ----- (7)}$$

Where  $k_2$  is the pseudo-second-order rate constant ( $\text{g mg}^{-1} \text{ min}^{-1}$ ).

**Intra-Particle diffusion model:**

The equation for intra-Particle diffusion model can be expressed as

$$q_t = k_{id} t^{1/2} + C \text{ ----- (8)}$$

Where,  $q_t$  is the adsorption capacity at any time  $t$  and  $k_{id}$  is the intra particle diffusion rate constant and  $C$  is the film thickness.
